# Supplementary material for: Influence of internalin a murinisation on host resistance to orally acquired listeriosis in mice
Source: PubMed Central journal article supplement (PMC3640945; doi:10.1186/1471-2180-13-90), 2013-04-23

**A**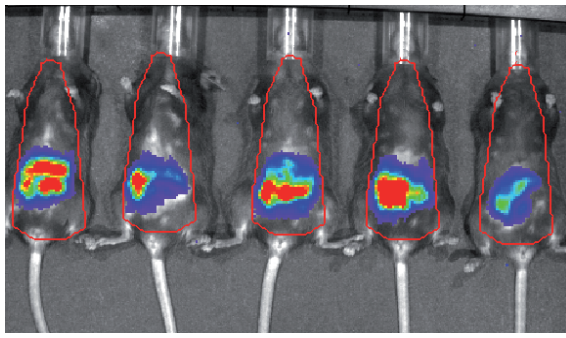**B**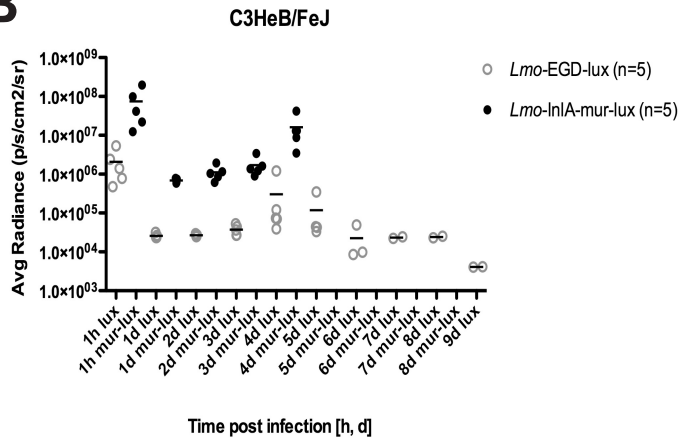**C**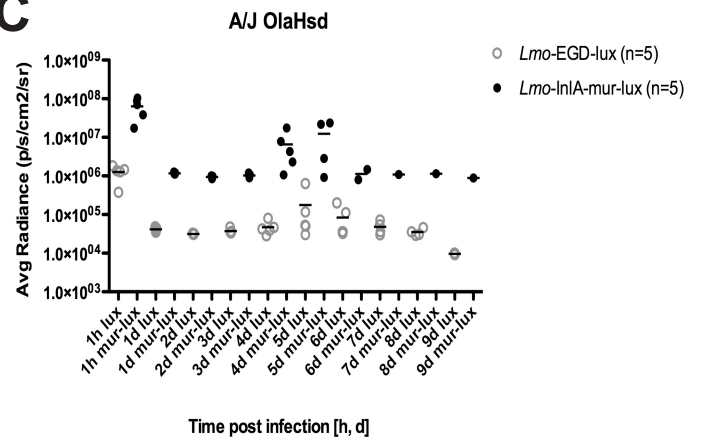**D**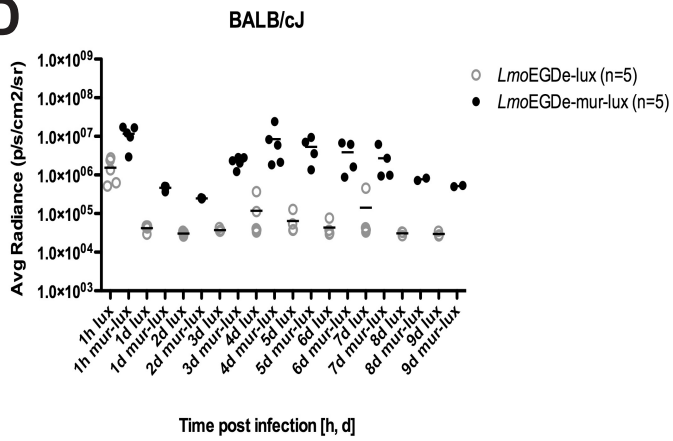**E**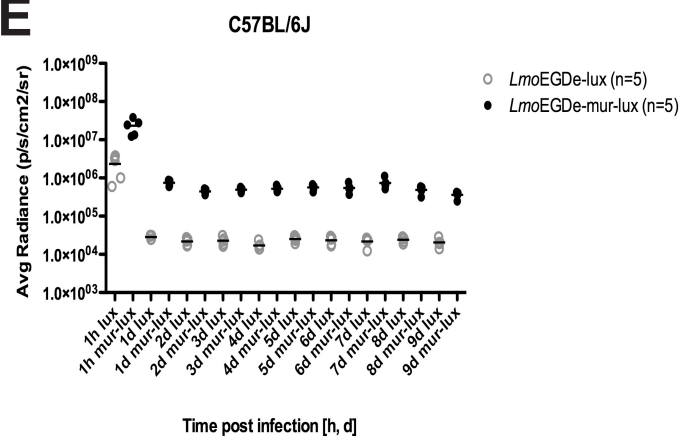

Supplement: 1471-2180-13-90-S1.pdf [file 1471-2180-13-90-S1.pdf]
