# Supplementary material for: Influence of internalin a murinisation on host resistance to orally acquired listeriosis in mice
Source: PubMed Central journal article supplement (PMC3640945; doi:10.1186/1471-2180-13-90), 2013-04-23

**A**Survival after *Lmo*-EGD-lux infection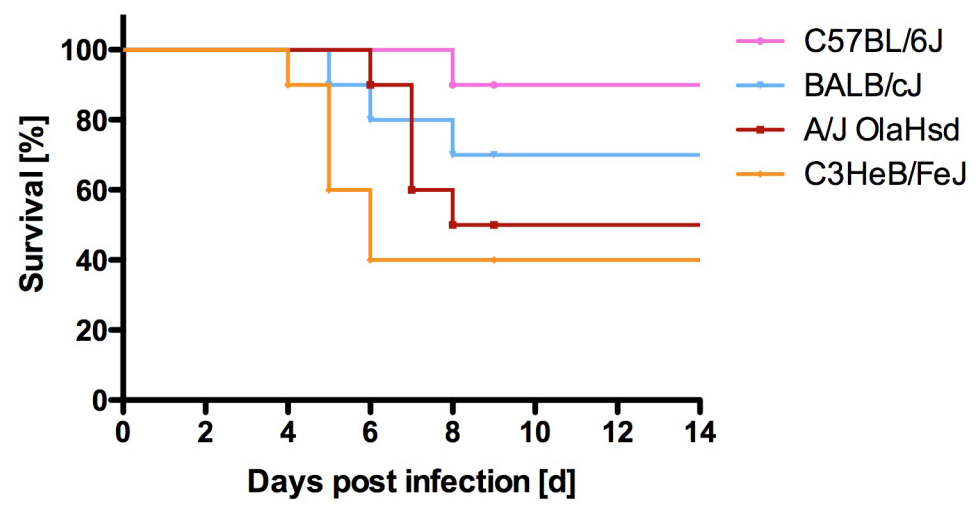**B**Survival after *Lmo*-InIA-mur-lux infection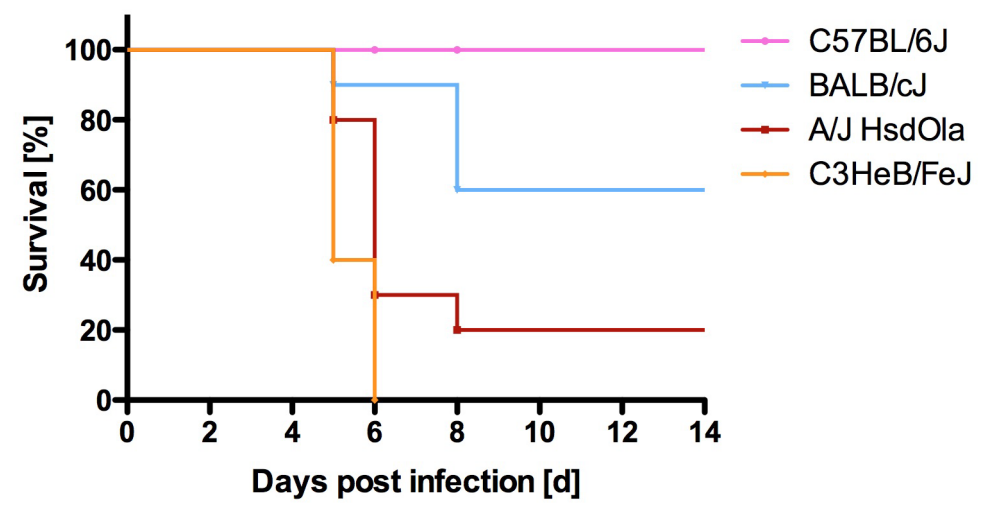

Supplement: 1471-2180-13-90-S3.pdf [file 1471-2180-13-90-S3.pdf]
